# Supplementary material for: Carbon nano-onion encapsulated cobalt nanoparticles for oxygen reduction and lithium-ion batteries
Source: Royal Society of Chemistry journal article supplement (doi:10.1039/d0ta12504k), 2021-01-01
Supplement: d0ta12504k4.pdf [file d0ta12504k4.pdf]

## Supporting information

### Carbon Nano-Onion Encapsulated Cobalt Nanoparticles for Oxygen Reduction and Lithium-Ion Batteries

Ming-Jun Xiao,<sup>a</sup> Bo Ma,<sup>a</sup> Ze-Qi Zhang,<sup>a</sup> Qi Xiao,<sup>a</sup> Xiang-Yang Li,<sup>a</sup> Zheng-Tao Zhang,<sup>a</sup>  
Qiang Wang,<sup>\*a</sup> Yong Peng,<sup>\*b</sup> and Hao-Li Zhang<sup>\*a, c</sup>

<sup>a</sup> State Key Laboratory of Applied Organic Chemistry, Key Laboratory of Special Function Materials and Structure Design, College of Chemistry and Chemical Engineering, Lanzhou University, Lanzhou, 730000, P. R. China.

<sup>b</sup> Key Laboratory of Magnetism and Magnetic Materials of MOE, Lanzhou University, Lanzhou, 730000, P. R. China.

<sup>c</sup> Tianjin Key Laboratory of Molecular Optoelectronic Sciences, Department of Chemistry, Tianjin University, Collaborative Innovation Center of Chemical Science and Engineering (Tianjin), Tianjin 300072, P. R. China.

\*Corresponding Author.

E-mail: haoli.zhang@lzu.edu.cn, qiangwang@lzu.edu.cn, pengy@lzu.edu.cn

All the density functional theory (DFT) calculations were performed by Vienna Ab-initio Simulation Package (VASP), employing the Projected Augmented Wave (PAW) method. The revised Perdew-Burke-Ernzerhof (RPBE) functional was used to describe the exchange and correlation effects. For all the geometry optimizations, cutoff energy was set to 500 eV. A 3×3×1 supercell grid was used to carry out the surface calculations on the surface of carbon material. A 1×1×1 supercell grid was used to carry out the surface calculations on the surface of nitrogen doped carbon material. A 3×3×2 supercell grid was used to carry out the surface calculations on the surface of nitrogen doped carbon encapsulated cobalt material.

The adsorption energy  $E_b$  is defined as follows:

$$E_b = E_{\text{total}} - (E_{\text{substrate}} + E_{\text{adsorbate}}) \quad (\text{S1})$$

where  $E_{\text{total}}$  is the total energy of the adsorbate-substrate system,  $E_{\text{substrate}}$  and  $E_{\text{adsorbate}}$  are the energies of the (pre-adsorbed or pure) substrate, and the free adsorption, respectively, in the following adsorption.

The computational hydrogen electrode (CHE) model was used to calculate the free energy of OER, based on which the free energy of an adsorbed species is defined:

$$\Delta G_{\text{ads}} = \Delta E_{\text{ads}} + \Delta E_{\text{ZPE}} - T\Delta_{\text{Sads}} \quad (\text{S2})$$

Where  $\Delta E_{\text{ads}}$  is the electronic adsorption energy,  $\Delta E_{\text{ZPE}}$  is the zero point energy difference between adsorbed and gaseous species, and  $T\Delta_{\text{Sads}}$  is the corresponding entropy difference between these two states.

**Table S1.** Charge transfer data of materials

|        |                 |       |       |       |      |       |       |       |       |       |       |      |
|--------|-----------------|-------|-------|-------|------|-------|-------|-------|-------|-------|-------|------|
| C      |                 | C1    | C2    | C3    | N1   | Co1-2 | Co2-1 | Co2-2 | Co3-1 | Co3-2 | Co4   |      |
|        | Original charge | 4     | 4     | 4     | 0    | 0     | 0     | 0     | 0     | 0     | 0     | 0    |
|        | Final charge    | 4     | 4     | 4     | 0    | 0     | 0     | 0     | 0     | 0     | 0     | 0    |
|        | Charge transfer | 0     | 0     | 0     | 0    | 0     | 0     | 0     | 0     | 0     | 0     | 0    |
| C-N    | Original charge | 4     | 4     | 4     | 5    | 0     | 0     | 0     | 0     | 0     | 0     | 0    |
|        | Final charge    | 3.7   | 3.7   | 3.7   | 6.27 | 0     | 0     | 0     | 0     | 0     | 0     | 0    |
|        | Charge transfer | -0.3  | -0.3  | -0.3  | 1.27 | 0     | 0     | 0     | 0     | 0     | 0     | 0    |
| Co-C-N | Original charge | 4     | 4     | 4     | 5    | 9     | 9     | 9     | 9     | 9     | 9     | 9    |
|        | Final charge    | 3.75  | 3.68  | 3.75  | 6.14 | 8.9   | 8.9   | 8.9   | 8.9   | 8.9   | 8.92  | 8.9  |
|        | Charge transfer | -0.25 | -0.32 | -0.25 | 1.14 | -0.1  | -0.1  | -0.1  | -0.1  | -0.1  | -0.08 | -0.1 |

C1, C2, and C3 are the three C atoms around N. Co1-1, Co1-2 are the two closest Co atoms around C1, and the other four, Co4 is the Co atom under N. Original charge is the original valence electron of ZAV in POTCAR. Final charge is the valence electron read from ACF. Charge transfer is final original, that is, valence state and gain and loss of electrons, and negative valence means loss of electrons.

**Table S2.** Free energy data of grapheme materials.

|      | E(DFT)/eV | $\Delta G$ /eV | G/eV      | Free-energy-eq                      | Free-energy/eV | U=0V   | U=1.23V |
|------|-----------|----------------|-----------|-------------------------------------|----------------|--------|---------|
| ALSB | -295.2370 | 0.0000         | -295.2370 | +2H <sub>2</sub> O                  | -323.6770      | 0.0000 | 0.0000  |
| *OH  | -303.5900 | 0.3430         | -303.2470 | +H <sub>2</sub> O+1/2H <sub>2</sub> | -320.8670      | 2.8100 | 1.5800  |
| *O   | -298.4000 | 0.0425         | -298.3575 | +H <sub>2</sub> O+H <sub>2</sub>    | -319.3775      | 4.2995 | 1.8395  |
| *OOH | -308.1300 | 0.2320         | -307.8980 | +3/2H <sub>2</sub>                  | -318.0980      | 5.5790 | 1.8890  |
| SLAB | -295.2400 | 0.0000         | -295.2400 | +O <sub>2</sub> +2H <sub>2</sub>    | -318.7600      | 4.9170 | -0.0030 |

**Table S3.** Free energy data of graphitic-NG materials.

|      | E(DFT)/eV | $\Delta G$ /eV | G/eV      | Free-energy-eq     | Free-energy/eV | U=0V   | U=1.23V |
|------|-----------|----------------|-----------|--------------------|----------------|--------|---------|
| ALSB | -293.2800 | 0.0000         | -293.2800 | +2H <sub>2</sub> O | -321.7200      | 0.0000 | 0.0000  |

|      |           |        |            |                                     |           |        |         |
|------|-----------|--------|------------|-------------------------------------|-----------|--------|---------|
| *OH  | -303.1100 | 0.3373 | --302.7727 | +H <sub>2</sub> O+1/2H <sub>2</sub> | -320.3927 | 1.3273 | 0.0973  |
| *O   | -298.3040 | 0.0523 | -298.2517  | +H <sub>2</sub> O+H <sub>2</sub>    | -319.2717 | 2.4483 | -0.0117 |
| *OOH | -307.3400 | 0.3853 | -306.9547  | +3/2H <sub>2</sub>                  | -317.1547 | 4.5653 | 0.8753  |
| SLAB | -293.2800 | 0.0000 | -293.2800  | +O <sub>2</sub> +2H <sub>2</sub>    | -316.8000 | 4.9200 | 0.0000  |

**Table S4.** Free energy data of Co/graphitic-NG materials.

|      | E(DFT)/eV  | $\Delta G$ /eV | G/eV       | Free-energy-eq                      | Free-energy/eV | U=0V   | U=1.23V |
|------|------------|----------------|------------|-------------------------------------|----------------|--------|---------|
| ALSB | -1522.4700 | 0.0000         | -1522.4700 | +2H <sub>2</sub> O                  | -1550.9100     | 0.0000 | 0.0000  |
| *OH  | -1532.0000 | 0.3640         | -1531.6360 | +H <sub>2</sub> O+1/2H <sub>2</sub> | -1549.2560     | 1.6540 | 0.4240  |
| *O   | -1527.8300 | 0.0786         | -1527.7514 | +H <sub>2</sub> O+H <sub>2</sub>    | -1548.7714     | 2.1386 | -0.3214 |
| *OOH | -1537.3100 | 0.5708         | -1536.7392 | +3/2H <sub>2</sub>                  | -1546.9392     | 3.9708 | 0.2808  |
| SLAB | -1522.4700 | 0.0000         | -1522.4700 | +O <sub>2</sub> +2H <sub>2</sub>    | -1545.9900     | 4.9200 | 0.0000  |

**Table S5.** Adsorption energy data of graphitic-NG materials.

| Adsorption energy |         |         |
|-------------------|---------|---------|
| *OH               | *O      | *OOH    |
| -1.1327           | -0.0117 | -0.3547 |

**Table S6.** Adsorption energy data of grapheme materials.

| Adsorption energy |        |        |
|-------------------|--------|--------|
| *OH               | *O     | *OOH   |
| 0.3500            | 1.8395 | 0.6590 |

**Table S7.** Adsorption energy data of Co/graphitic-NG materials.

| Adsorption energy |         |         |
|-------------------|---------|---------|
| *OH               | *O      | *OOH    |
| -0.8060           | -0.3214 | -0.9492 |

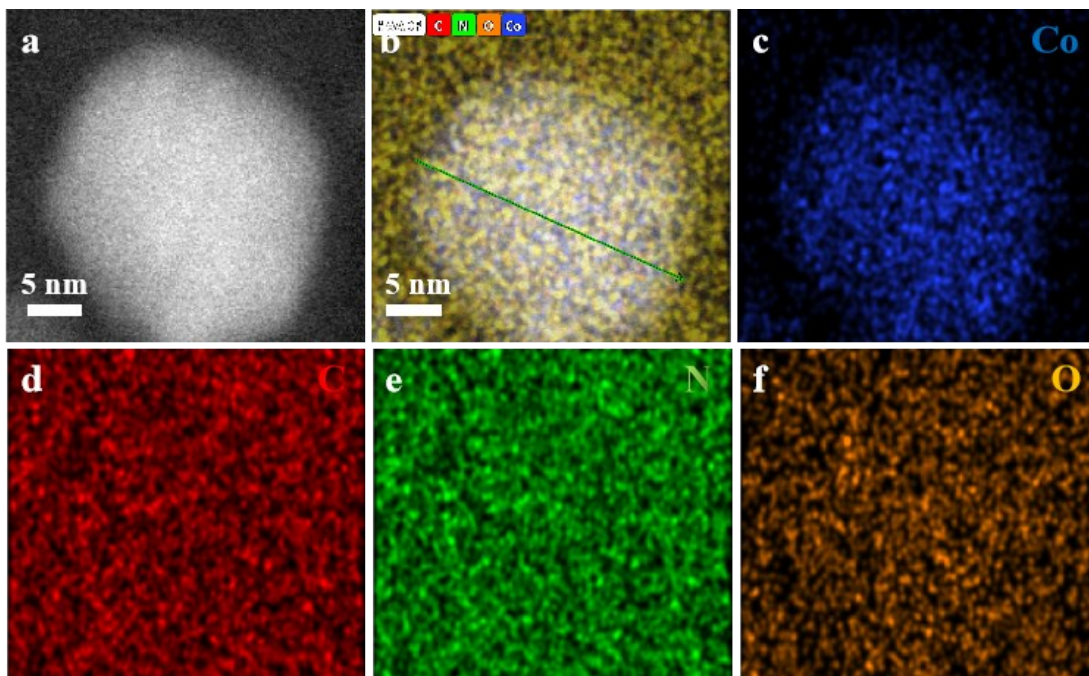

**Figure S1.** HADDF-STEM and EDX mapping of Co-NCNO-450 (a-f).

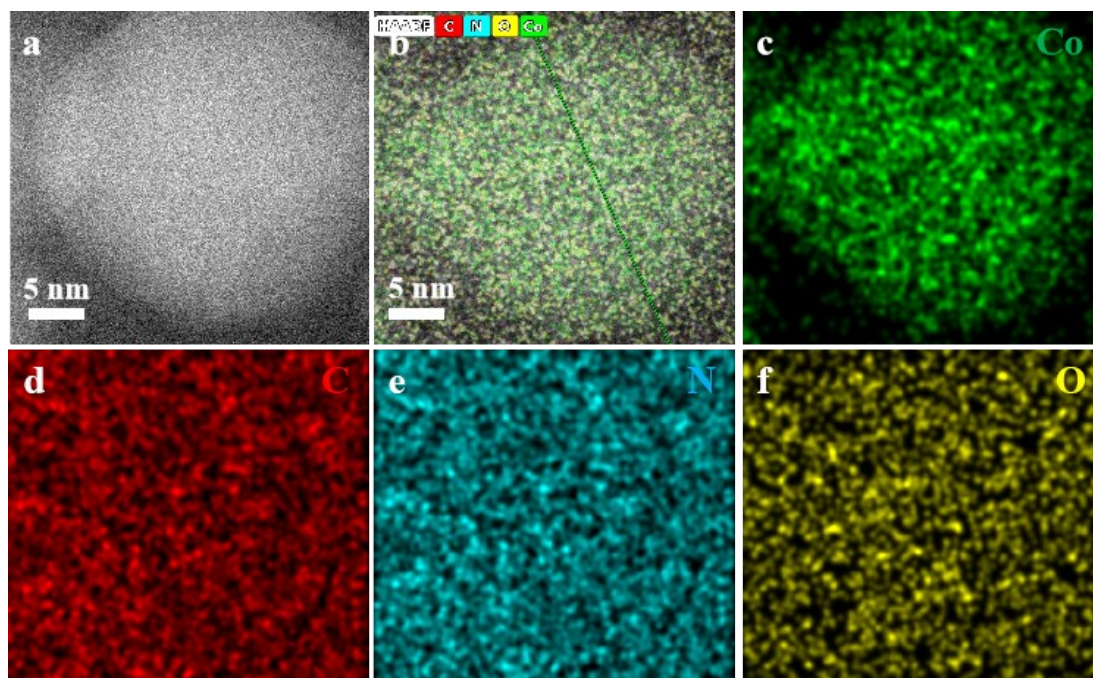

**Figure S2.** HADDF-STEM and EDX mapping of Co-NCNO-850 (a-f).

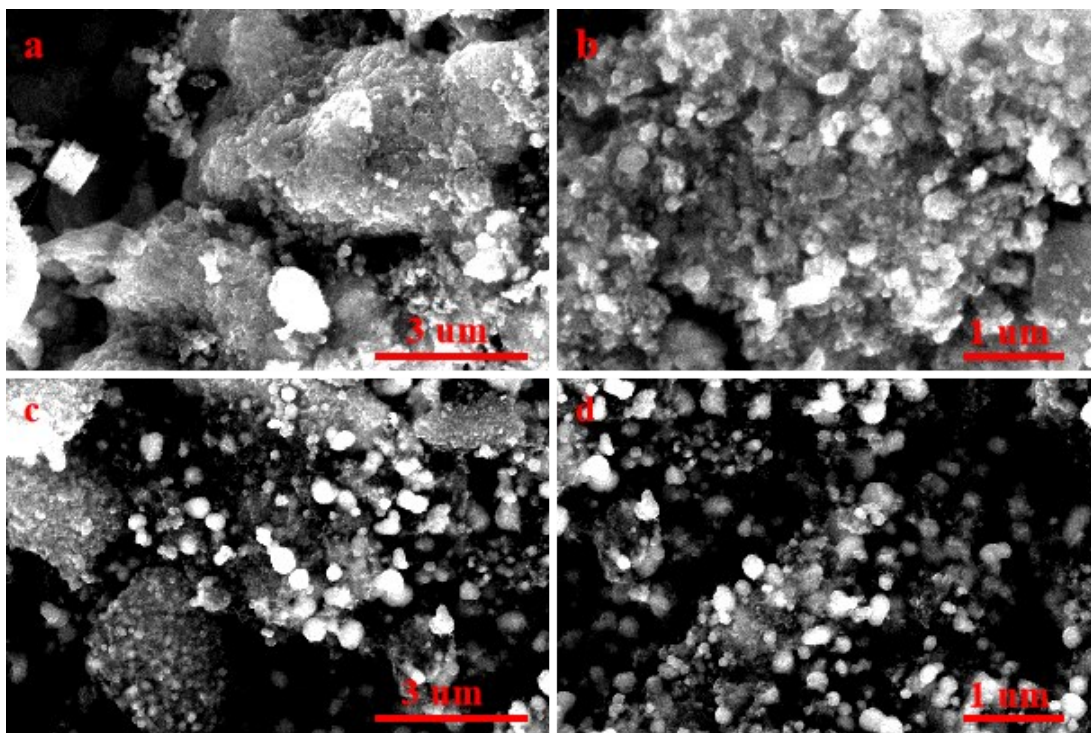

**Figure S3.** SEM images at different magnification of Co-NCNO-450 (a-b) and Co-NCNO-850 (c-d).

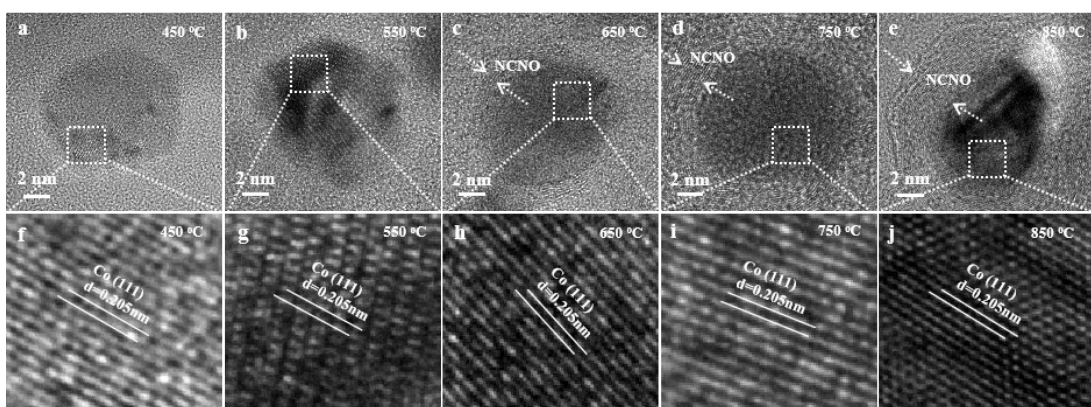

**Figure S4.** Ex-situ TEM (a-e) and corresponding HR-TEM (f-j) of Co-NCNO-450 from 450 °C to 850 °C.

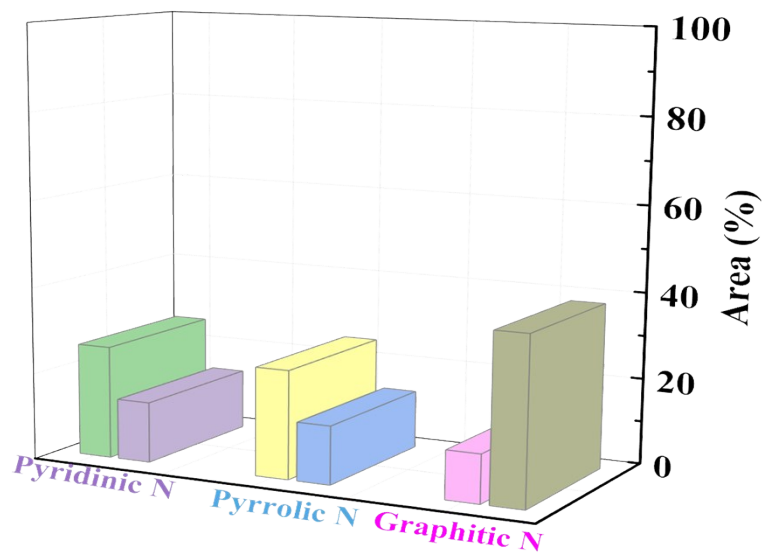

**Figure S5.** The content of different type nitrogen of Co-NCNO-450 and Co-NDCNO-850.

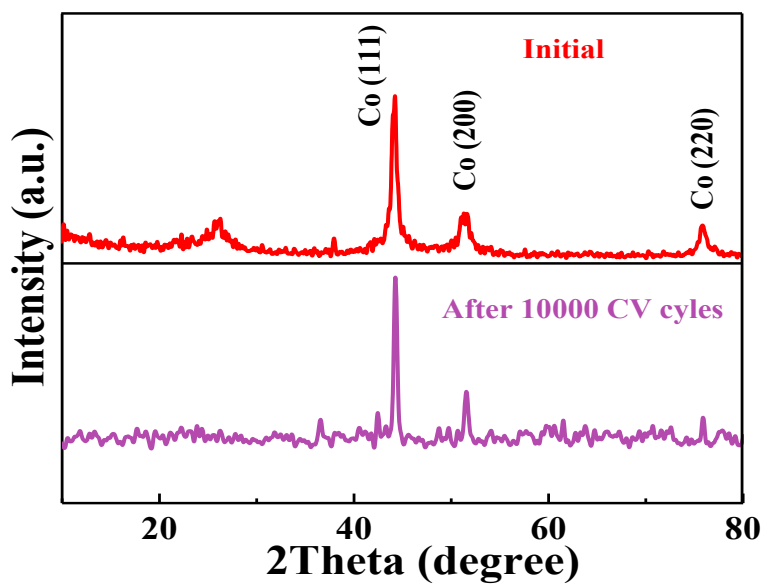

**Figure S6.** XRD patterns of Co-NCNO-850 before and after 10000 CV cycles.

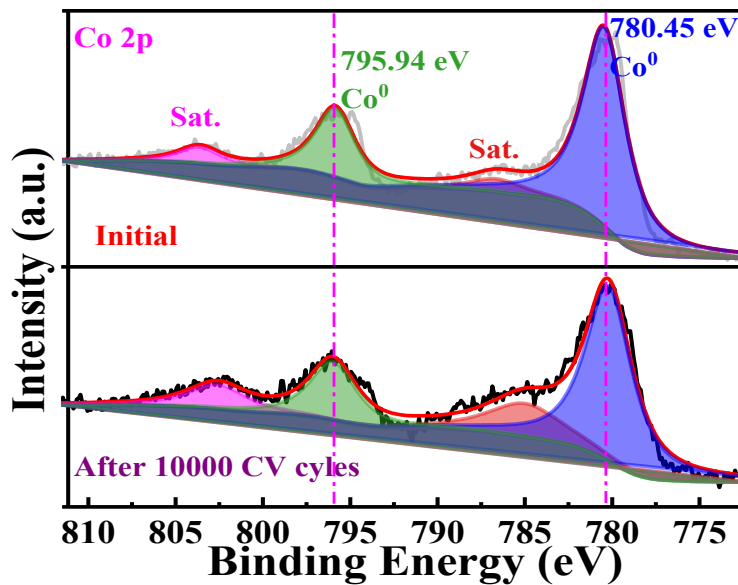

**Figure S7.** High-resolution XPS spectra of Co 2p of Co-NCNO-850 before and after 10000 CV cycles.

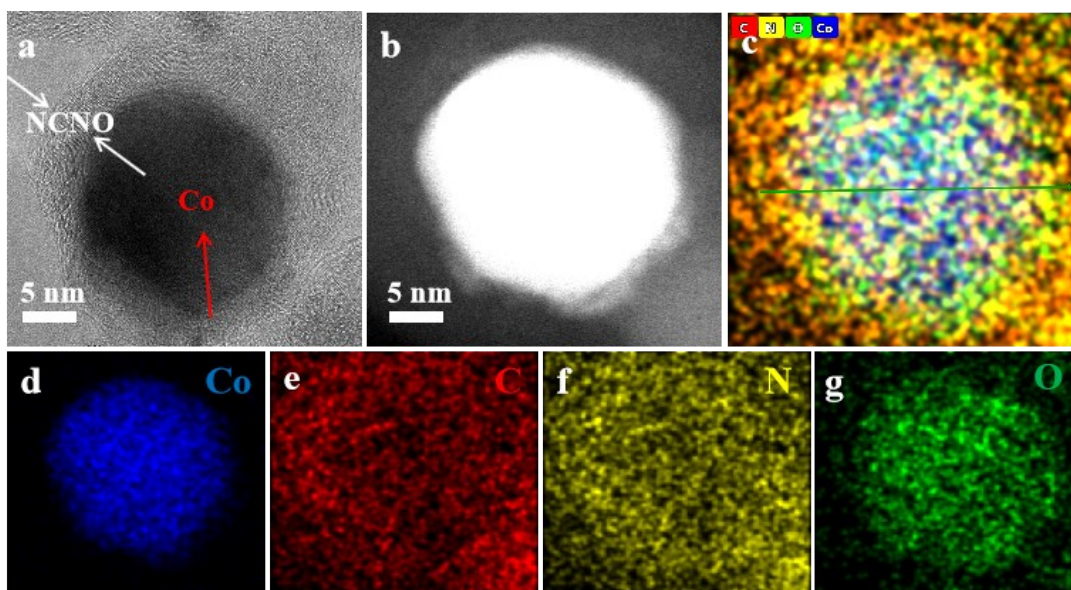

**Figure S8.** TEM and EDX mapping of Co-NCNO-850 (a-g) after ORR.



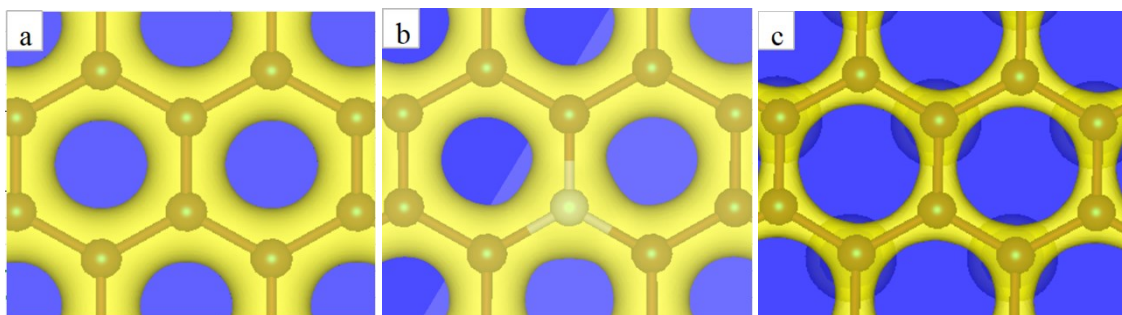

**Figure S9.** Charge density distribution images of graphene (a), graphitic-NG (b), Co/graphitic-NG (c).

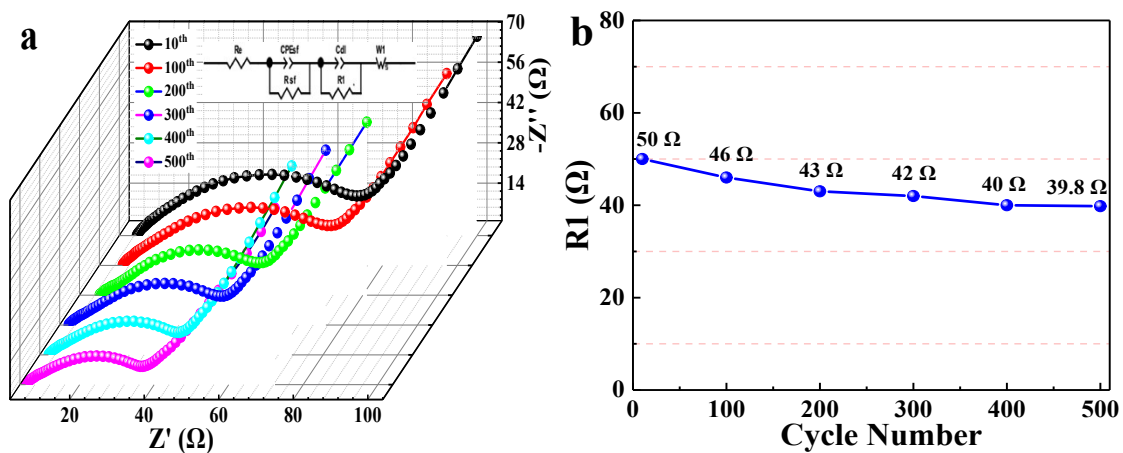

**Figure S10.** Nyquist plots data and fitted results (inset of the equivalent circuit) (a), charge transfer resistance of Co-NCNO-850.

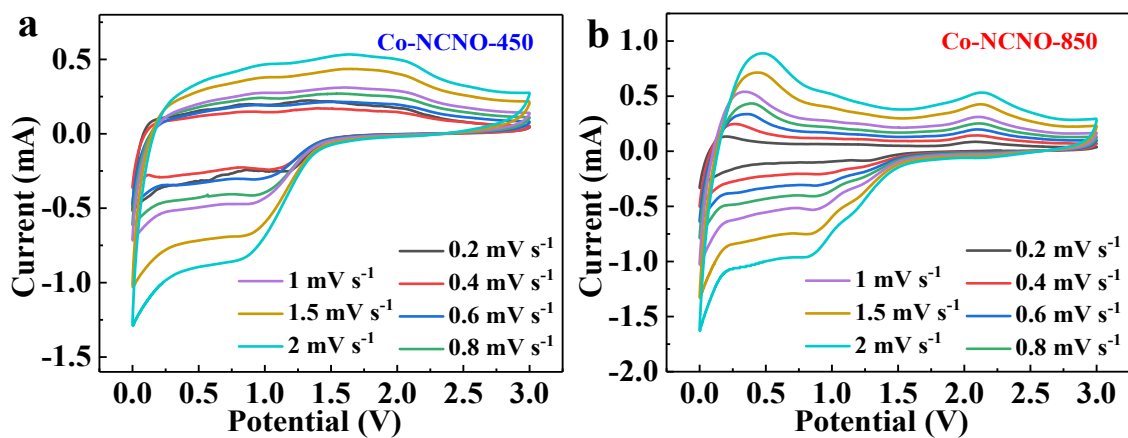

**Figure S11.** CV curves at different scan rates of Co-NCNO-450 (a) and Co-NCNO-850 (b).

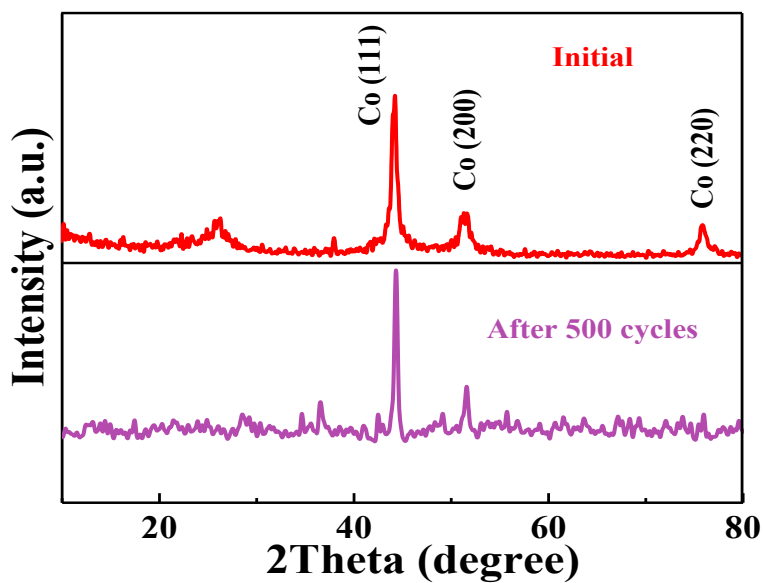

**Figure S12.** XRD patterns of Co-NCNO-850 initial and after 500 cycles.

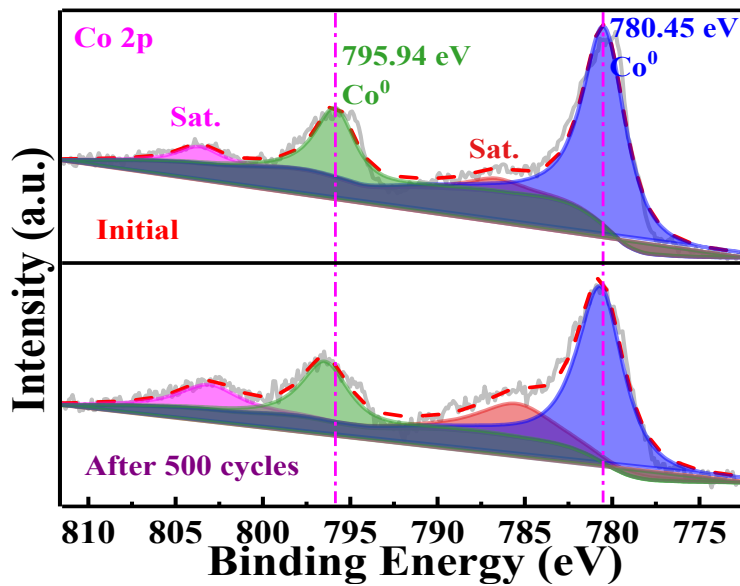

**Figure S13.** High-resolution Co 2p spectra of Co-NCNO-850 initial and after 500 cycles.

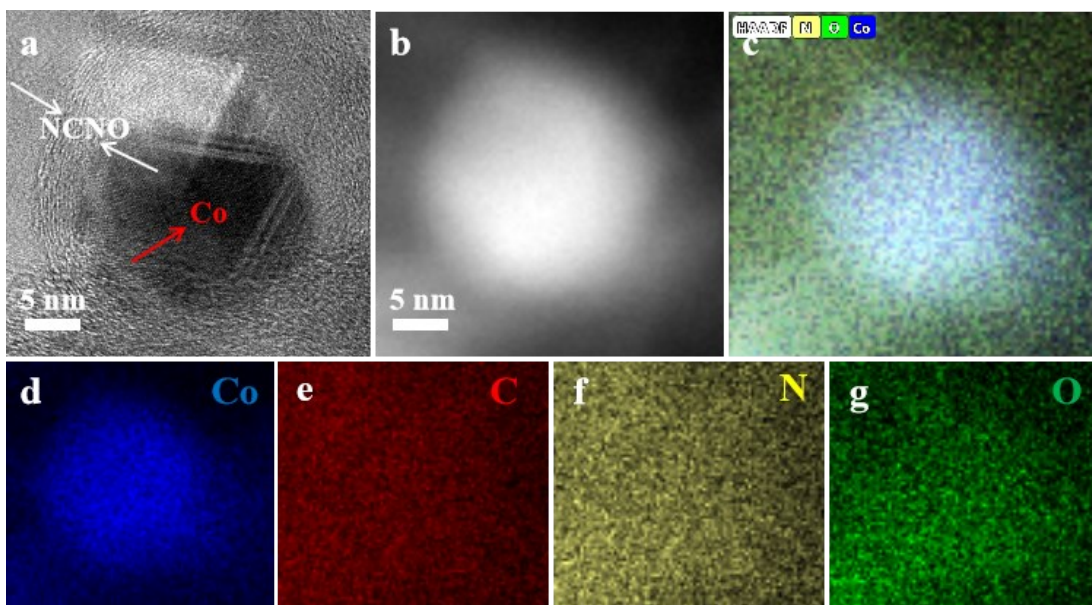

**Figure S14.** TEM and EDX mapping of Co-NCNO-850 (a-g) after 500 cycles at the current density of 0.5 C.

**Table S8.** The element content of Co-NCNO-450 and Co-NCNO-850 was obtained by XPS.

|             |         |           |          |           |
|-------------|---------|-----------|----------|-----------|
| Co-NCNO-450 | Element | C         | Co       | N         |
|             | Content | 71.88 at% | 8.82 at% | 19.30 at% |
| Co-NCNO-850 | Element | C         | Co       | N         |
|             | Content | 90.13 at% | 7.40 at% | 2.47 at%  |

**Table S9.** The electrochemical performance comparison of the Co-NCNO with similar materials for ORR.

| Materials                       | Method                                                          | $E_{\text{ORR}}/\text{mV}$<br>(Half-wave potential) | Tafel slope/<br>mV/dec | References |
|---------------------------------|-----------------------------------------------------------------|-----------------------------------------------------|------------------------|------------|
| Co@G/N-GCNs                     | Facile pyrolysis strategy                                       | 860                                                 | 69.66                  | 1          |
| Co-N-doped Carbon Nanosheets    | Self-assembly strategy                                          | 930                                                 | 69                     | 2          |
| Co@NC Core Shell Nanostructures | One-pot synthesis from Co-MOFs,                                 | 880                                                 | 55                     | 3          |
| Co@NC-MOF                       | Annealing ZIF-67/PEI/GO hybrid                                  | 150                                                 | 69                     | 4          |
| CS-Co/NGs                       | Pyrolyzing silica@CoZn imidazolate frameworks                   | 160                                                 | 86                     | 5          |
| NiN co-doped porous carbon      | Treatment of g-C <sub>3</sub> N <sub>4</sub> incorporated ZIF-8 | 760                                                 |                        | 6          |

|                      |                                                                                     |     |    |          |
|----------------------|-------------------------------------------------------------------------------------|-----|----|----------|
| Co/N-co-doped carbon | Utilizes an octahedral Co(II) complex with 2,6-bis(benzimidazol-2-yl)pyridine (BBP) | 810 |    | 7        |
| Co-CNF               | Carbonization of a newly MOFs                                                       | 820 |    | 8        |
| Co@G/C               | One-step thermal treatment process                                                  | 800 |    | 9        |
| Co/N-C               | Solvo-thermal carbonization strategy                                                |     | 61 | 10       |
| Commercial Pt/C      |                                                                                     | 800 |    |          |
| Co-NCNO-850          | One-step carbonization                                                              | 767 | 53 | Our work |

**Table S10.** The electrochemical performance comparison of the Co-NCNO with similar materials for LIBs.

| Materials                    | Method                                          | Cycle number | Specific capacity (mA h g <sup>-1</sup> ) | Current density (mA g <sup>-1</sup> ) | References |
|------------------------------|-------------------------------------------------|--------------|-------------------------------------------|---------------------------------------|------------|
| Co/CMK-3 nanocomposites      | Sonochemical method                             | 50           | 720                                       | 50                                    | 11         |
| Graphene-Ni                  | In-situ reduced from NiO by graphene            | 35           | 675                                       | 100                                   | 12         |
| Co/G composites              | Pyrolyzing the ZIF-67/graphene oxide composites | 120          | 670.8                                     | 50                                    | 13         |
| C/Co composite nano-fibers   | Electrospinning and subsequent heat treatment   | 50           | 804                                       | 100                                   | 14         |
| C/Co composite               | Pyrolysis of polymeric cobalt phthalocyanine    | 40           | 600                                       | 50                                    | 15         |
| 2D Ni@PGC nanosheets         |                                                 | 100          | 740                                       | 100                                   | 16         |
| Porous graphene/Co           |                                                 | 300          | 163                                       | 1000                                  | 17         |
| Ni/C hierarchical composites | Green sol-gel route                             | 100          | 635                                       | 200                                   | 18         |
| PCC-CoO <sub>x</sub>         |                                                 | 2000         | 580                                       | 1000                                  | 19         |
| Co@PCNS                      | NaCl template                                   | 100          | ~700                                      | 500                                   | 20         |
| Co-NCNO-850                  | One-step carbonization                          | 500          | 774                                       | 0.5 C                                 | Our work   |

## References

1. H. J. Niu, L. Zhang, J. J. Feng, Q. L. Zhang and A. J. Wang, *J. Colloid Interf. Sci.*, 2019, **552**, 744-751.
2. X. Luo, X. Wei, H. Wang, Y. Wu, W. Gu and C. Zhu, *ACS Sustain. Engineering*, 2020, **8**, 9721-9730.
3. S. G. Peera, J. Balamurugan, N. H. Kim and J. H. Lee, *Small*, 2018, **14**, 1800441-1800455.

4. Q. Gao, Y. Huang, X. Han, X. Qin and M. Zhao, *Energy Technol-Ger*, 2018, **6**, 2282-2288.
5. T. Feng, H. Qin and M. Zhang, *Chemistry*, 2018, **24**, 10178-10185.
6. V. Priya K, M. Thomas, R. Illathvalappil, S. K, S. Kurungot, B. N. Nair, A. P. Mohamed, G. M. Anilkumar, T. Yamaguchi and U. S. Hareesh, *New J. Chem.*, 2020, **44**, 12343-12354.
7. S. Chao, Z. Bai, Q. Cui, H. Yan, K. Wang and L. Yang, *Carbon*, 2015, **82**, 77-86.
8. M. Kim, D.-H. Nam, H.-Y. Park, C. Kwon, K. Eom, S. Yoo, J. Jang, H.-J. Kim, E. Cho and H. Kwon, *J. Mater. Chem. A*, 2015, **3**, 14284-14290.
9. M. Sharma, J.-H. Jang, D. Y. Shin, J. A. Kwon, D.-H. Lim, D. Choi, H. Sung, J. Jang, S.-Y. Lee, K. Y. Lee, H.-Y. Park, N. Jung and S. J. Yoo, *Energy Environ. Sci.*, 2019, **12**, 2200-2211.
10. Y. Su, Y. Zhu, H. Jiang, J. Shen, X. Yang, W. Zou, J. Chen and C. Li, *Nanoscale*, 2014, **6**, 15080-15089.
11. H. Qiao, Z. Xia, Y. Liu, R. Cui, Y. Fei, Y. Cai, Q. Wei, Q. Yao and Q. Qiao, *Appl. Surf. Sci.*, 2017, **400**, 492-497.
12. Y. J. Mai, J. P. Tu, C. D. Gu and X. L. Wang, *J. Power Sources*, 2012, **209**, 1-6.
13. G.-C. Li and W. Zhao, *J. Alloys Compd.*, 2017, **716**, 156-161.
14. L. Wang, Y. Yu, P.-C. Chen and C.-H. Chen, *Scripta Mater.*, 2008, **58**, 405-408.
15. J. Yue, X. Zhao and D. Xia, *Electrochem. Commun.*, 2012, **18**, 44-47.
16. J. Zhang, H. Zhu, P. Wu, C. Ge, D. Sun, L. Xu, Y. Tang and Y. Zhou, *Nanoscale*, 2015, **7**, 18211-18217.
17. H. Cao, X. Zhou, W. Deng and Z. Liu, *J. Mater. Chem. A*, 2016, **4**, 6021-6028.
18. L. Su, Z. Zhou and P. Shen, *J. Phys. Chem. C*, 2012, **116**, 23974-23980.
19. X. Sun, G.-P. Hao, X. Lu, L. Xi, B. Liu, W. Si, C. Ma, Q. Liu, Q. Zhang, S. Kaskel and O. G. Schmidt, *J. Mater. Chem. A*, 2016, **4**, 10166-10173.
20. V. Etacheri, C. N. Hong, J. Tang and V. G. Pol, *ACS Appl. Mater. Interfaces*, 2018, **10**, 4652-4661.
